# Supplementary material for: Octanuclear MnIII6MnIILn (Ln = Gd, Dy and Er) clusters with a novel core topology: syntheses, structures, and magnetic properties
Source: Royal Society of Chemistry journal article supplement (doi:10.1039/c2dt32739b), 2013-01-01
Supplement: c2dt32739b.pdf [file c2dt32739b.pdf]

## Supporting Information

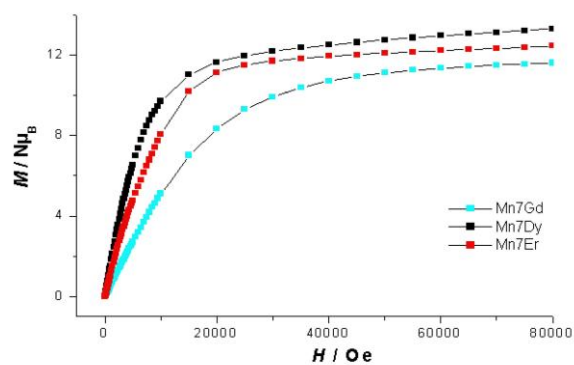

Figure S1. Plots of  $M/N\mu_B$  vs  $H$  for complexes 1-3 at 2K. Solid lines are eye guides.

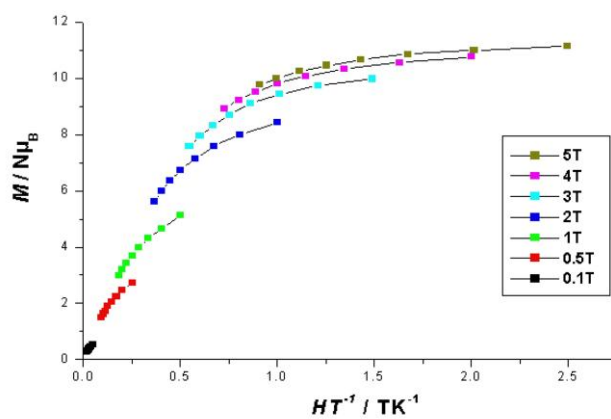

Figure S2. Plots of  $M/N\mu_B$  vs  $H/T$  for complex 1 (Mn<sub>7</sub>Gd) at the indicated applied fields. Solid lines are eye guides.

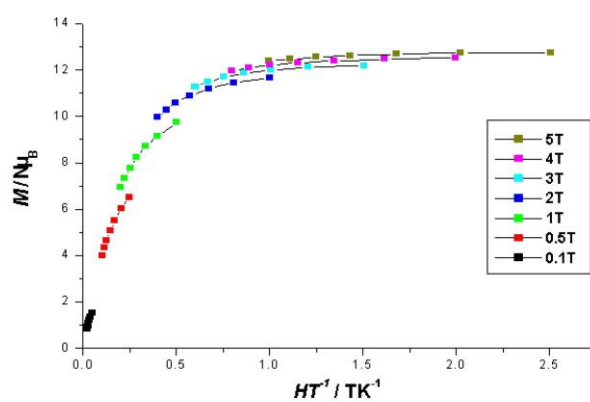

Figure S3. Plots of  $M/N\mu_B$  vs  $H/T$  for complex 2 (Mn<sub>7</sub>Dy) at the indicated applied fields. Solid lines are eye guides.

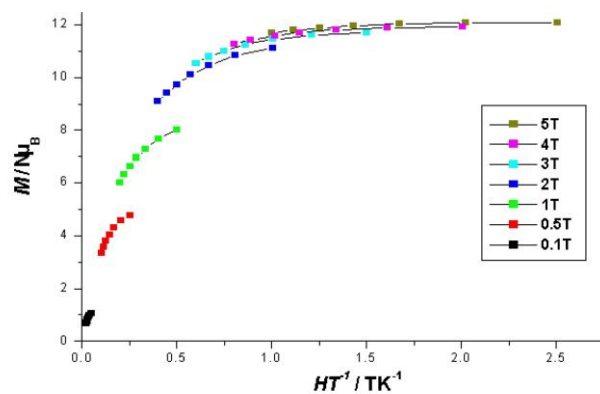

**Figure S4.** Plots of  $M/N\mu_B$  vs  $H/T$  for complex **3** ( $\text{Mn}_7\text{Er}$ ) at the indicated applied fields. Solid lines are eye guides.

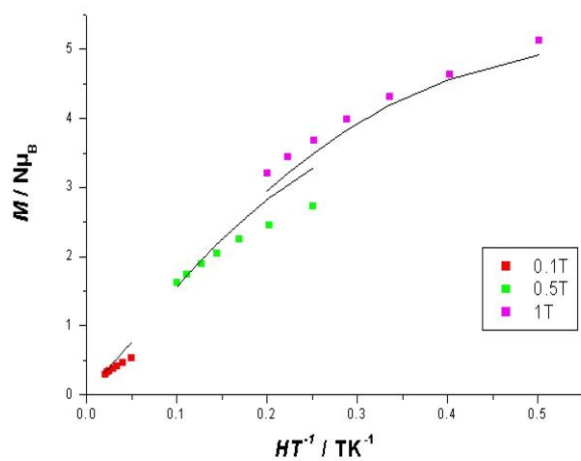

**Figure S5.** Plots of  $M/N\mu_B$  vs  $H/T$  for complex **1** ( $\text{Mn}_7\text{Gd}$ ) at the indicated applied fields. Solid lines represent the best fits of the data.

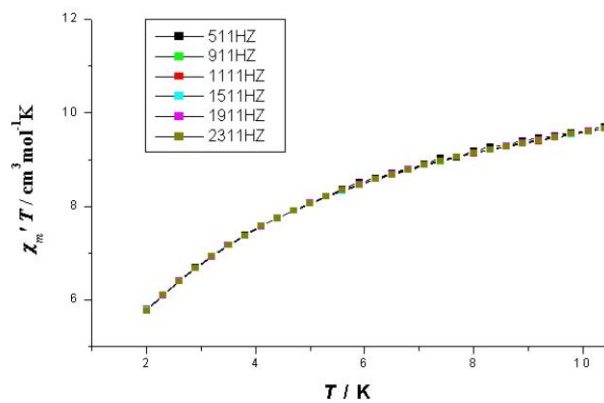

**Figure S6.** In-phase ( $\chi'_m$ ) (as  $\chi'_m T$ ) ac susceptibility signals of complex **1** in a 3.0 G field oscillating at the indicated frequencies.

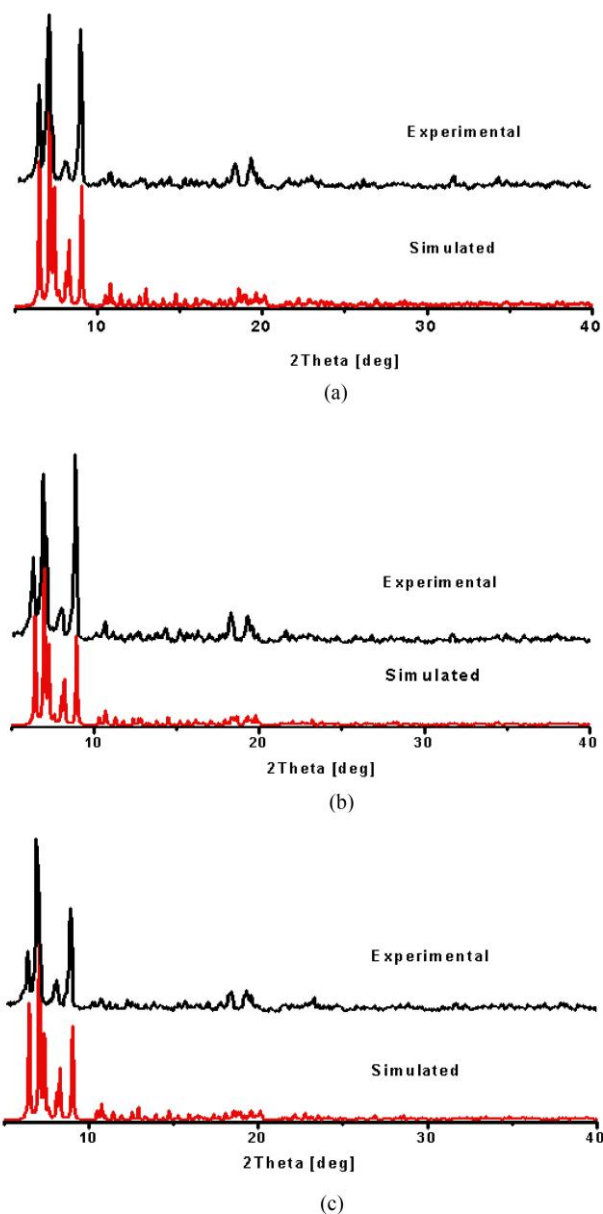

Figure S7. XRPD patterns for complexes 1-3

Table S1. Bond-Valence Sums for the O Atoms of Complex 3<sup>a</sup>.

| atom | BVS  | assignment      | group              | atom | BVS  | assignment      | group              |
|------|------|-----------------|--------------------|------|------|-----------------|--------------------|
| O1   | 1.82 | RO <sup>-</sup> | Piv <sup>-</sup>   | O16  | 1.81 | RO <sup>-</sup> | Piv <sup>-</sup>   |
| O2   | 1.68 | RO <sup>-</sup> | Piv <sup>-</sup>   | O17  | 1.69 | RO <sup>-</sup> | Mdea <sup>2-</sup> |
| O3   | 1.8  | RO <sup>-</sup> | Piv <sup>-</sup>   | O18  | 1.86 | RO <sup>-</sup> | Mdea <sup>2-</sup> |
| O4   | 1.71 | RO <sup>-</sup> | Piv <sup>-</sup>   | O19  | 1.94 | RO <sup>-</sup> | Piv <sup>-</sup>   |
| O5   | 1.93 | RO <sup>-</sup> | Mdea <sup>2-</sup> | O20  | 1.83 | RO <sup>-</sup> | Piv <sup>-</sup>   |
| O6   | 1.98 | RO <sup>-</sup> | Mdea <sup>2-</sup> | O21  | 2.24 | RO <sup>-</sup> | Mdea <sup>2-</sup> |
| O7   | 1.93 | RO <sup>-</sup> | Piv <sup>-</sup>   | O22  | 2.23 | RO <sup>-</sup> | Mdea <sup>2-</sup> |
| O8   | 1.49 | RO <sup>-</sup> | Piv <sup>-</sup>   | O23  | 1.96 | RO <sup>-</sup> | Piv <sup>-</sup>   |

|     |      |                 |                    |     |      |                 |                  |
|-----|------|-----------------|--------------------|-----|------|-----------------|------------------|
| O9  | 1.9  | RO <sup>-</sup> | Piv <sup>-</sup>   | O24 | 1.75 | RO <sup>-</sup> | Piv <sup>-</sup> |
| O10 | 1.93 | RO <sup>-</sup> | Piv <sup>-</sup>   | O25 | 1.11 | OH              | OH               |
| O11 | 1.85 | RO <sup>-</sup> | Piv <sup>-</sup>   | O26 | 0.98 | OH              | OH               |
| O12 | 1.88 | RO <sup>-</sup> | Piv <sup>-</sup>   | O27 | 2.02 | O <sup>2-</sup> | O <sup>2-</sup>  |
| O13 | 1.87 | RO <sup>-</sup> | MdeaH <sup>-</sup> | O28 | 0.99 | OH              | OH               |
| O14 | 1.23 | ROH             | MdeaH <sup>-</sup> | O29 | 2.03 | O <sup>2-</sup> | O <sup>2-</sup>  |
| O15 | 2.06 | RO <sup>-</sup> | Piv <sup>-</sup>   |     |      |                 |                  |

<sup>a</sup> BVS values for O atoms of RO<sup>-</sup> and ROH groups are typically 1.8–2.0 and 1.0–1.2, respectively, but can be affected by hydrogen bonding.

Table S2. Bond-Valence Sums for the Mn<sup>a</sup> Atoms of Complex **3**.

| atom | Mn <sup>2+</sup> | Mn <sup>3+</sup> | Mn <sup>4+</sup> |
|------|------------------|------------------|------------------|
| Mn1  | 3.2              | <u>2.95</u>      | 2.92             |
| Mn2  | 3.38             | <u>3.12</u>      | 3.06             |
| Mn3  | <u>1.91</u>      | 1.76             | 1.73             |
| Mn4  | 3.40             | <u>3.14</u>      | 3.08             |
| Mn5  | 3.38             | <u>3.11</u>      | 3.06             |
| Mn6  | 3.23             | <u>2.98</u>      | 2.92             |
| Mn7  | 3.34             | <u>3.08</u>      | 3.02             |

<sup>a</sup>The underlined value is the closest to the charge for which it was calculated, and the nearest whole number can be taken as the oxidation state of the atom.
